# Supplementary material for: A rare case of deafness and renal abnormalities in HDR syndrome caused by a de novo mutation in the GATA3 gene
Source: PubMed Central journal article supplement (PMC6415598; doi:10.1590/1678-4685-gmb-2017-0194), 2018-11-14
Supplement: 1415-4757-GMB-1678-4685-GMB-2017-0194-s002.pdf [file 1415-4757-GMB-1678-4685-GMB-2017-0194-s002.pdf]

**Supplementary Material to “A rare case of deafness and renal abnormalities in HDR syndrome caused by a *de novo* mutation in the *GATA3* gene”**

**Table S1** - Detailed list of primers used in the study.

| Gene           | Reaction           | Primer Forward (5'>3')     | Primer Reverse (5'>3')                                | T <sub>m</sub> (°C) | Fragment size (bp) |
|----------------|--------------------|----------------------------|-------------------------------------------------------|---------------------|--------------------|
| <i>GJB2</i>    | Coding region      | CTCCCTGTTCTGTCCTAGC        | GGTTGCCTCATCCCTC                                      | 54                  | 815                |
| <i>GJB6</i>    | GJB6-              | TCATAGTGAAGAACTCGATGCTGTTT | CAGCGGCTACCCTAGTTGTGGT <sup>[17]</sup> <sub>SEP</sub> | 62                  | 460                |
|                | GJB6-              | CACCATGCGTAGCCTTAACCATTTT  | TTTAGGGCATGATTGGGGTGATTT                              | 62                  | 564                |
|                | Control            | CGTCTTTGGGGGTGTTGCTT       | CATGAAGAGGGCGTACAAGTTAGA                              | 62                  | 333                |
| <i>MT-RNR1</i> | m.A1555G           | ATATCTGAACACACAATAGC       | GAAACCGACCTGGATTACTC                                  | 54                  | 2060               |
| <i>GATA3</i>   | Exon 6             | GAGACAGGAGAAGGTGGGAG       | CTCTAACCCATGGCGGTGA                                   | 59                  | 446                |
| <i>STRs</i>    | <i>D8S1179</i>     | CTTGGGGTGTGCGCTTTTCT       | TGCATTGTTGTTGGGAATGT                                  | 60                  | 396                |
|                | <i>D3S1358</i>     | AGCTATTCCCAGGTGAGGAC       | TGAGATGGGAGGATCACTTG                                  | 58                  | 466                |
|                | <i>D5S818</i>      | CCCATCTGGATAGTGGACCT       | TTTTAAAATTAAATACTGAGACATGC                            | 58                  | 374                |
|                | <i>D7S820</i>      | CGATTCCACATTTATCCTCA       | AGTGCAGTGGTGCATCT                                     | 57                  | 393                |
|                | <i>D18S51</i>      | CAAAAATTAGTTGGGCATGG       | CCGACTACCAGCAACAACAC                                  | 58                  | 400                |
|                | <i>FGA</i>         | GCAGAAGCTGGATATGCTGT       | CATCTTAACTGGCATTTCATGG                                | 58                  | 393                |
|                | <i>CSF1PO</i>      | TCAGACTCTTCCACACACCA       | GAGTGATGGGGTCAGATTGT                                  | 57                  | 400                |
|                | <i>TH01</i>        | CTCCTGTGGGCTGAAAAG         | TAGTCAGCACCCCAACCA                                    | 55                  | 299                |
| <i>D21S11</i>  | AGACTTGACAGCCCACTG | AAACTGAGAAGGGAGAAACA       | 58                                                    | 400                 |                    |
